# Supplementary material for: Social Learning of Acquiring Novel Feeding Habit in Mandarin Fish (Siniperca chuatsi)
Source: Int J Mol Sci. 2019 Sep 7;20(18):4399. doi: 10.3390/ijms20184399 (PMC6770103; doi:10.3390/ijms20184399)
Supplement: Supplementary file 1 [file ijms-20-04399-s001.xlsx]

## Sheet: Sheet1
gene name	gene symbol	gene_id	average_fpkm_control	average_fpkm_learning	diffexp_log2fc_control-vs-learning	qvalue	pvalue
Neurotrophin signaling pathway
14-3-3 protein epsilon	14-3-3C	CL3234.Contig1_All	20.153	42.193	1.07248	7.57786e-284	5.88652e-285
growth factor receptor-binding protein 2	GRB2	Unigene23125_All	11.173	26.756	1.26913	3.71101e-226	3.65225e-227
novel protein kinase C delta type	PKCδ	Unigene23409_All	4	13.426	1.75455	1.7425e-243	1.59817e-244
inhibitor of nuclear factor kappa-B kinase subunit beta	IKKβ	Unigene19841_All	1.273	8.023	2.66376	9.56014e-107	1.88061e-107
brain-derived neurotrophic factor	BDNF	Unigene24850_All	1.9	8.613	2.19089	2.28706e-91	5.14194e-92
nuclear factor NF-kappa-B p105 subunit	NFkB	CL2679.Contig1_All	0.183	0.82	2.15254	1.32951e-05	1.81307e-05
phosphatidylinositol phospholipase C, gamma-1	PLCy	CL4710.Contig3_All	0	0.496	4.78148	9.85546e-05	0.000147751
ras-related protein rap-1A	RAPS	CL1804.Contig3_All	0	0.223	4.72804	0.000132208	0.00020095
mitogen-activated protein kinase kinase 1	MEK1/2	CL1331.Contig1_All	0.873	0.07	-3.66176	7.19677e-27	4.05569e-27
cAMP signaling pathway
ghrelin	GHRL	Unigene40633_All	0.783	2.216	1.51067	1.46145e-06	1.83123e-06
B-Raf proto-oncogene serine/threonine-protein kinase	B-Raf	Unigene26921_All	0.556	1.89	1.76235	2.26165e-12	2.01318e-12
nuclear factor NF-kappa-B p105 subunit	NFkB	Unigene26921_All	0.556	1.89	1.76235	2.26165e-12	2.01318e-12
follicle stimulating hormone	FSH	Unigene25036_All	5.81	1.496	-1.96008	1.16892e-59	3.73838e-60
hedgehog interacting protein	Hip1	Unigene35160_All	11.52	4.566	-1.33537	4.92168e-189	5.72104e-190
Long-term potentiation
rap guanine nucleotide exchange factor 3	EPAC1	CL3644.Contig2_All	7.183	22.953	1.6731	0	0
protein phosphatase 1 regulatory subunit 1A	I-1	CL2013.Contig2_All	4.196	10.31	1.30745	5.39263e-163	7.22542e-164
phospholipase C	PLC	CL766.Contig9_All	0.573	0	-8.88405	2.55604e-46	9.89511e-47
mitogen-activated protein kinase kinase 1	MEK1/2	CL1331.Contig1_All	0.873	0.07	-3.66176	7.19677e-27	4.05569e-27
adenylate cyclase 1	AC1/8	CL5278.Contig2_All	20.396	4.94	-2.05183	0	0
Long-term depression
nitric oxide synthase	NOS	Unigene24394_All	5.713	23.573	2.05608	4.24369e-81	1.05783e-81
protein phosphatase 1 regulatory subunit 17	GS	Unigene2736_All	0.283	3.57	3.6685	3.7967e-19	2.63499e-19
corticotropin releasing hormone	CRF	Unigene41849_All	0.35	0.99	1.49762	5.97761e-05	8.73982e-05
phospholipase C	PLC	CL766.Contig9_All	0.573	0	-8.88405	2.55604e-46	9.89511e-47
mitogen-activated protein kinase kinase 1	MEK1/2	CL1331.Contig1_All	0.873	0.07	-3.66176	7.19677e-27	4.05569e-27
glutamate ionotropic receptor delta type subunit 2	δ2R	Unigene17092_All	4.07	1.876	-1.11294	2.27201e-10	2.22181e-10
metabotropic glutamate receptor 1	mGluR1	CL5266.Contig1_All	4.563	1.916	-1.24972	1.19226e-56	3.96515e-57
Dopaminergic synapse
catechol O-methyltransferase	COMT	Unigene31539_All	6.823	25.16	1.89249	3.49025e-279	2.77527e-280
circadian locomoter output cycles kaput protein	CLOCK	Unigene26344_All	3.273	9.53	1.55312	1.18993e-62	3.65276e-63
calcyon neuron specific vesicular protein	Calcyon	CL8169.Contig2_All	2.33	5.073	1.1325	8.84203e-38	3.96175e-38
monoamine oxidase	MAO	CL6591.Contig1_All	1.583	3.723	1.23827	3.32928e-32	1.66603e-32
dopamine receptor D3	D3、4	CL6925.Contig1_All	0.276	0.97	1.82371	3.32928e-32	1.66603e-32
phospholipase C	PLC	CL766.Contig9_All	0.573	0	-8.88405	2.55604e-46	9.89511e-47
calcium voltage-gated channel subunit alpha1 A	Cav21/22	Unigene14050_All	1.293	0.443	-1.54241	1.72551e-06	2.17414e-06
dopa decarboxylase	DDC	Unigene20360_All	3.603	1.513	-1.24639	1.01883e-21	6.56549e-22
protein phosphatase 4 catalytic subunit alpha	PP2B	Unigene38616_All	45.863	11.143	-2.04603	0	0
Glutamatergic synapse
metabotropic glutamate receptor 5	mGluR5	Unigene35605_All	1.246	12.913	3.37457	0	0
phospholipase C	PLC	CL766.Contig9_All	0.573	0	-8.88405	2.55604e-46	9.89511e-47
homer scaffold protein	Homer	CL2110.Contig4_All	6.54	2.74	-1.25473	8.25221e-66	2.43942e-66
metabotropic glutamate receptor 2/3	mGluR2/3	Unigene15339_All	15.943	5.596	-1.51489	1.46185e-233	1.40023e-234
protein phosphatase 3 catalytic subunit alpha	PP2B	Unigene38616_All	45.863	11.143	-2.04603	0	0
Cholinergic synapse
janus kinase 2	JAK2	CL7229.Contig2_All	0.15	0.683	2.21247	1.84818e-05	2.55916e-05
Serotonergic synapse
rap guanine nucleotide exchange factor 3	Epac	CL3644.Contig2_All	7.183	22.953	1.6731	0	0
prostaglandin-endoperoxide synthase 1	COX	Unigene28814_All	4.19	8.87	1.09603	6.76058e-43	2.76143e-43
5-hydroxytryptamine receptor4,6,7	5-HT4,6,7	Unigene52969_All	0.336	2.47	2.89321	2.75241e-18	1.96083e-18
phospholipase C	PLC	CL766.Contig9_All	0.573	0	-8.88405	2.75241e-18	1.96083e-18
mitogen-activated protein kinase kinase 1	MEK1	CL1331.Contig4_All	2.106	0.52	-2.0147	2.62547e-39	1.14317e-39
dopa decarboxylase	DDC	Unigene20360_All	3.603	1.513	-1.24639	1.01883e-21	6.56549e-22
